# Supplementary material
Source: PubMed Central journal article supplement (PMC3236499)
Supplement: NIHMS341806-supplement-01.pdf [file NIHMS341806-supplement-01.pdf]

Current Biology, Volume 21

## Supplemental Information

### The 3'-to-5' Exoribonuclease Nibbler

### Shapes the 3' Ends of MicroRNAs

### Bound to *Drosophila* Argonaute1

Bo W. Han, Jui-Hung Hung, Zhiping Weng, Phillip D. Zamore,  
and Stefan L. Ameres

## Supplemental Inventory

### 1. Supplemental Figures and Tables

Figure S1, related to Figure 1

Figure S2, related to Figure 2

Figure S3, related to Figure 3

Figure S4, related to Figure 4

Figure S5, related to Figure 5

Table S1A and S1B, related to Figure 4

### 2. Supplemental Experimental Procedures

### 3. Supplemental References

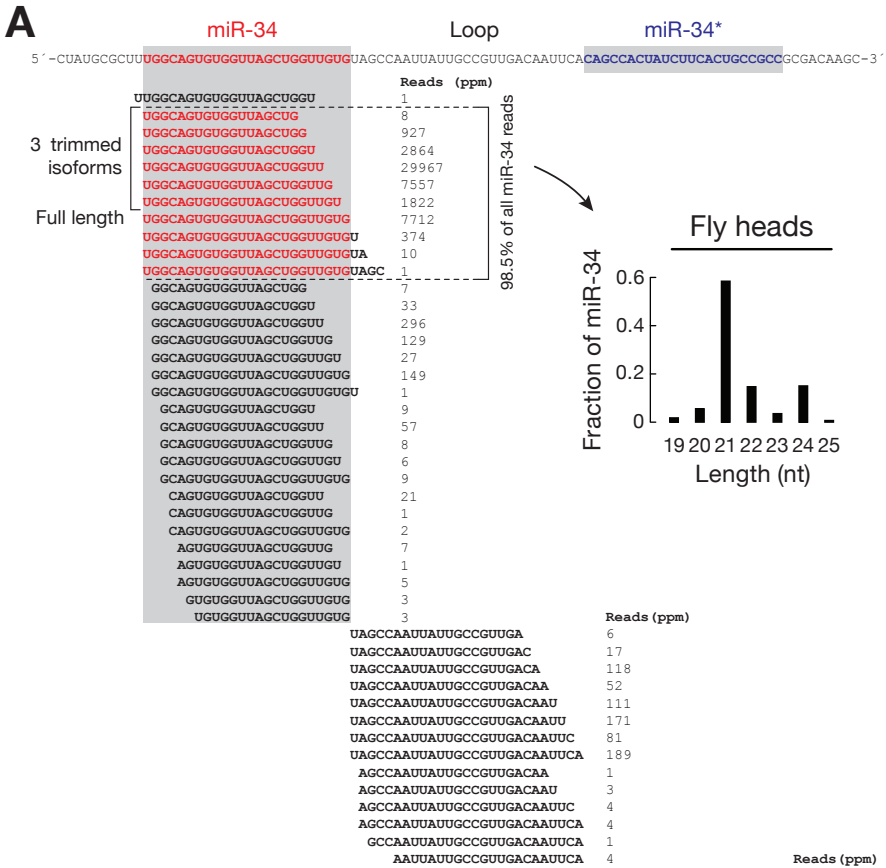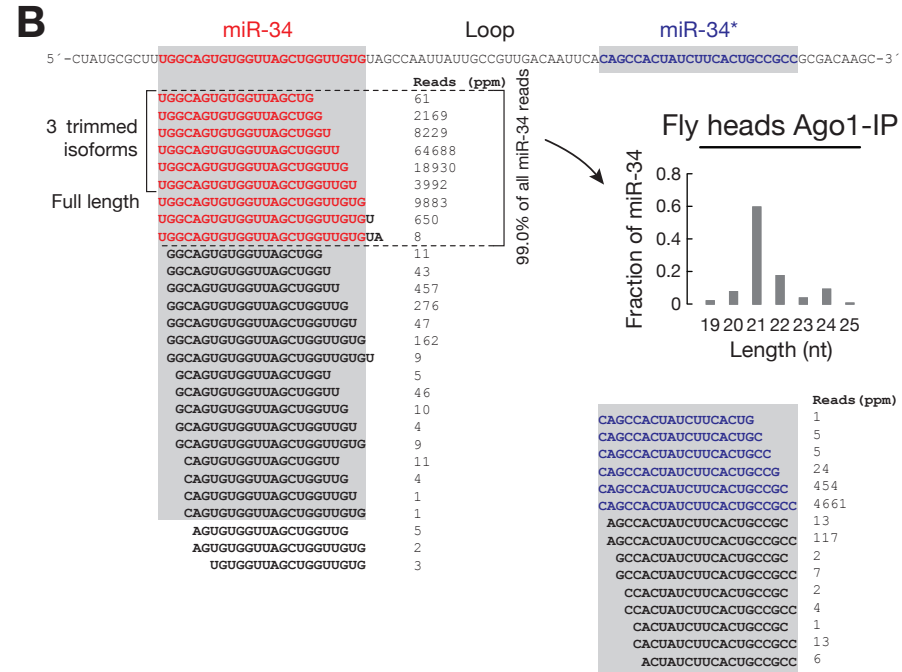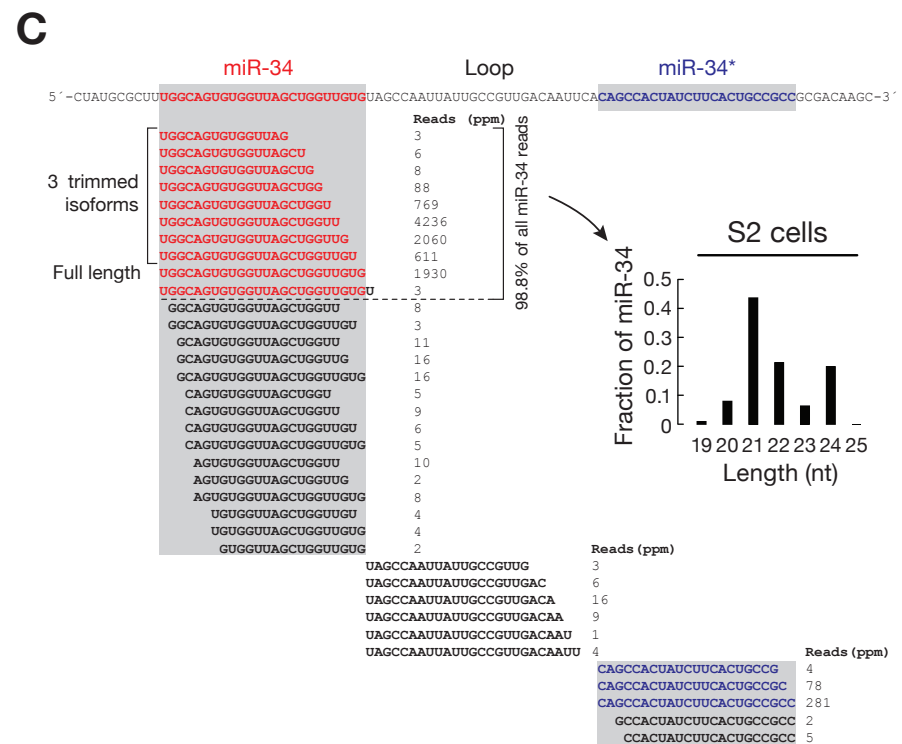

**Figure S1. 5' and 3' miR-34 Isoforms from Fly Heads, Related to Figure 1**

Reads mapping to the pre-miR-34 hairpin in high throughput sequencing datasets of total small RNAs from fly heads (A), Ago1-bound small RNAs in fly heads (B), and total small RNAs from S2 cells (C). Red, miR-34 reads that share the most abundant 5' end; blue, miR-34\*. Read abundance is reported as parts per million (ppm). The length distribution of miR-34 reads sharing the most abundant 5' end is shown.

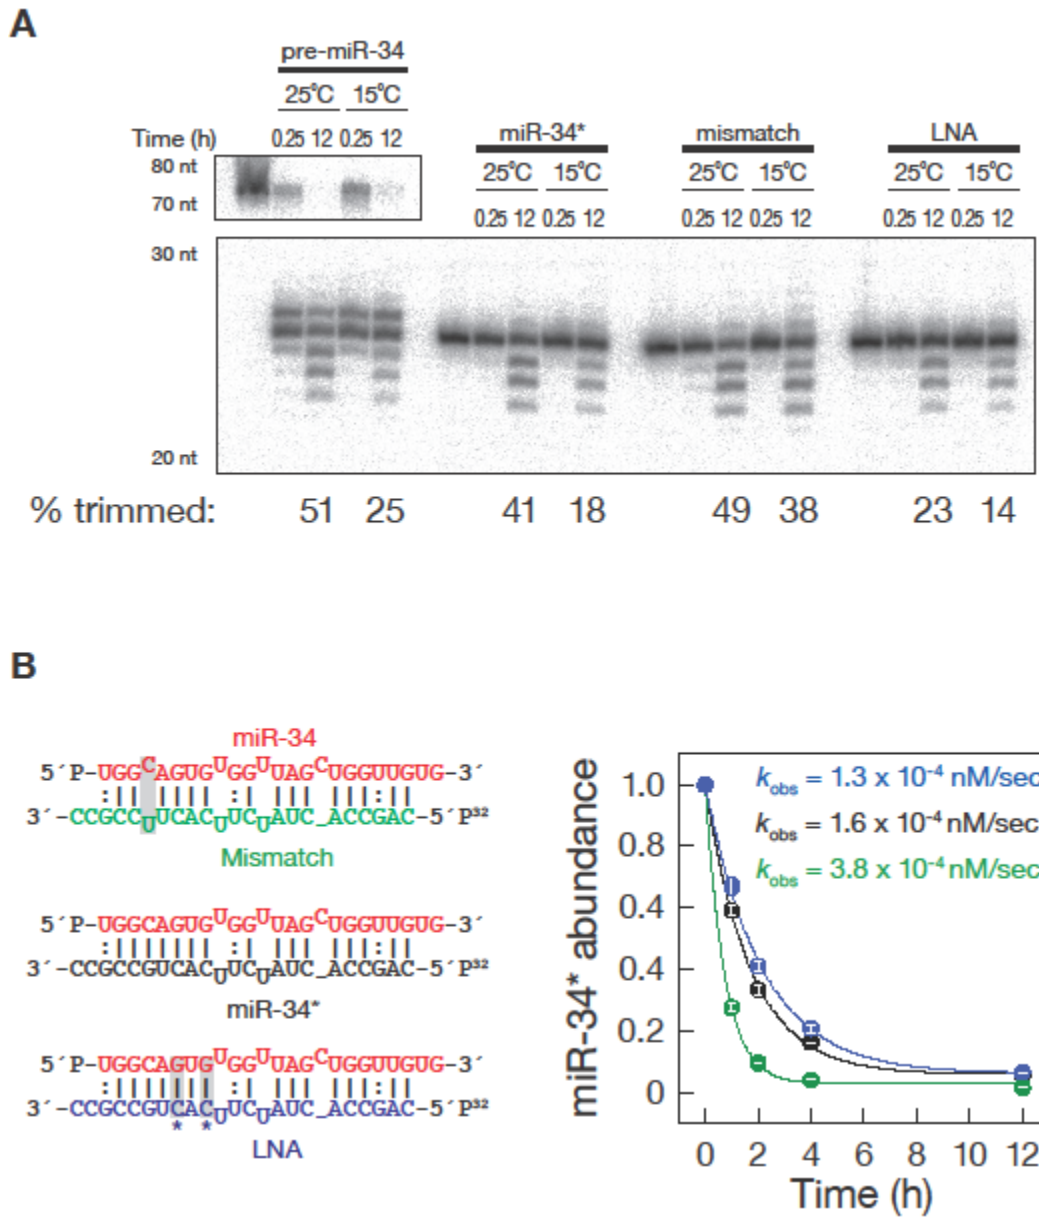

**Figure S2. miRNA\* Strand Removal Limits miR-34 Trimming, Related to Figure 2**

(A) 5' <sup>32</sup>P-radiolabeled pre-miR-34, mature miR-34/miR-34\* duplex, miR-34 mismatched duplex or miR-34 LNA duplex was incubated in 0–2 h embryo lysate at 25°C or 15°C, then analyzed by denaturing polyacrylamide gel electrophoresis.

(B) Synthetic duplexes of 5' <sup>32</sup>P-radiolabeled miR-34\* variants (green, black, and blue) paired to non-radioactive, phosphorylated miR-34 (red) were incubated in 0–2 h embryo lysate, and then the decrease in abundance was analyzed by denaturing polyacrylamide gel electrophoresis. Mean ± standard deviation for three independent replicates. Decay rates ( $k_{obs}$ ) were calculated by fitting the data to a single exponential.

**A**

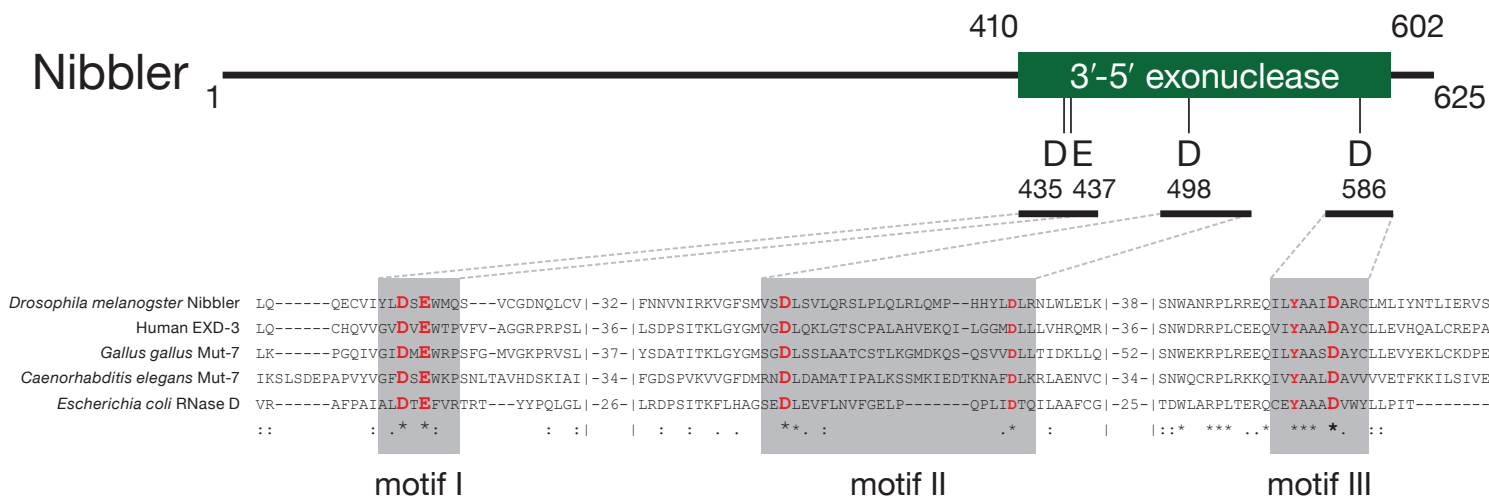

**B**

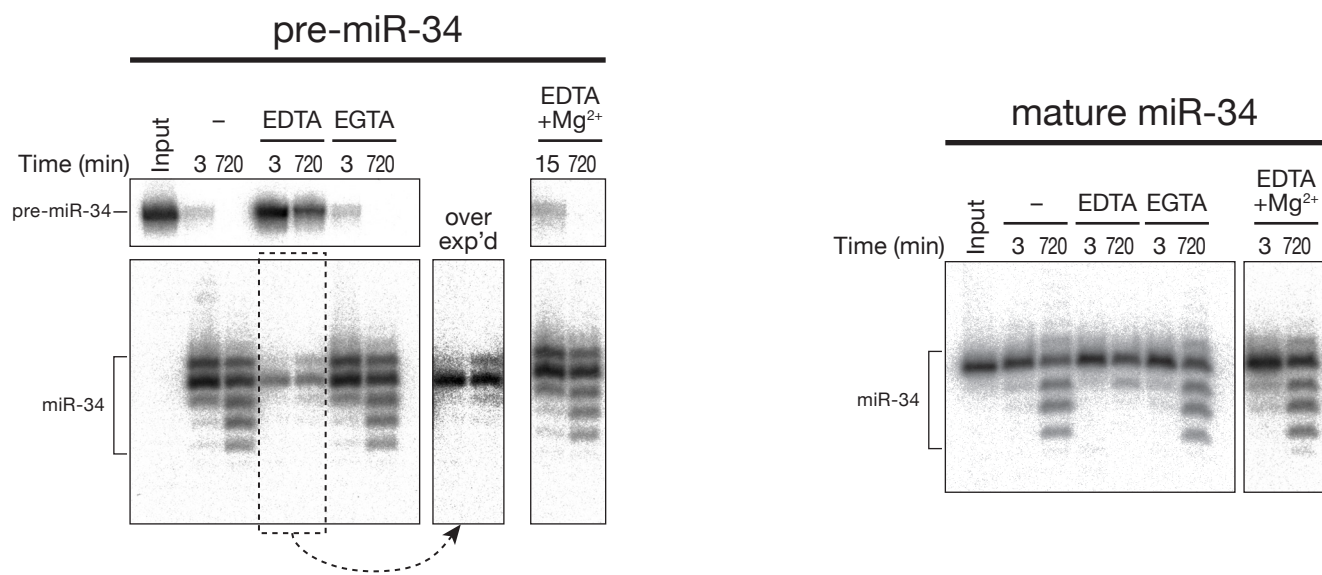

**C**

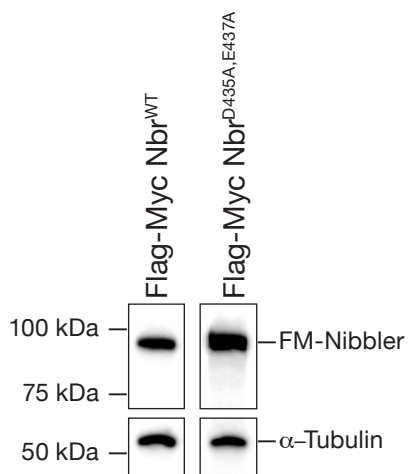

**D**

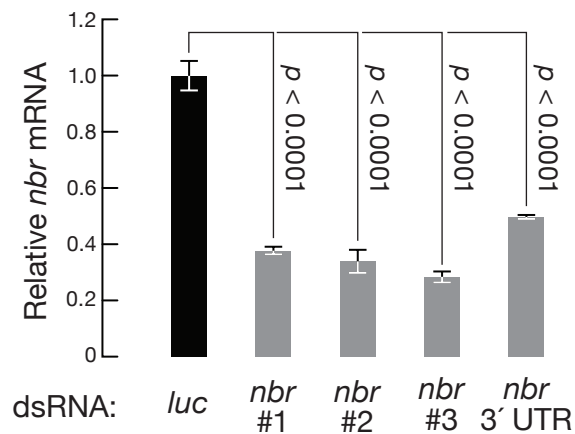

**Figure S3. The 3'-to-5' Exoribonuclease Nibbler (CG9247) Trims miRNAs, Related to Figure 3**

(A) Nibbler belongs to the DEDD superfamily of exonucleases. The four invariant exonuclease domain amino acids (DEDD) required for catalysis are indicated. Multiple sequence alignment of three conserved regions of five DEDD family members is shown below. Red, conserved amino acids required for catalysis.

(B) Trimming of miR-34 requires  $Mg^{2+}$ . 5'  $^{32}P$ -radiolabeled pre-miR-34 or a miR-34/miR-34\* duplex was incubated in 0–2 h embryo lysate containing additional water (control), 5 mM (f.c.) EDTA, 5 mM EGTA, or 5 mM EDTA plus 5 mM  $Mg^{2+}$ . Samples were analyzed by denaturing polyacrylamide gel electrophoresis.

(C) Western blot analysis of stable S2 cell lines expressing an amino terminally 3xFLAG-6xMyc tagged version of wild-type or catalytic mutant Nibbler. Transgenic Nibbler was detected using mouse anti-FLAG monoclonal antibody (Sigma; F-1804; 1:3,000 dilution).  $\alpha$ -Tubulin served as a loading control and was detected using a mouse monoclonal antibody (Sigma; T-9026; 1:10,000 dilution).

(D) *nibbler* mRNA abundance in S2 cells transfected with double-stranded RNA targeting luciferase or different regions of *nibbler* mRNA (see Figure 3B). *nibbler* mRNA levels were measured by quantitative RT-PCR. Data were normalized to mRNA levels of ribosomal protein L32 (alternatively called *rp49* or *RpL32*). Mean  $\pm$  standard deviation for three biological replicates is shown. Student's t-test was used to determine *p*-values.

**A**

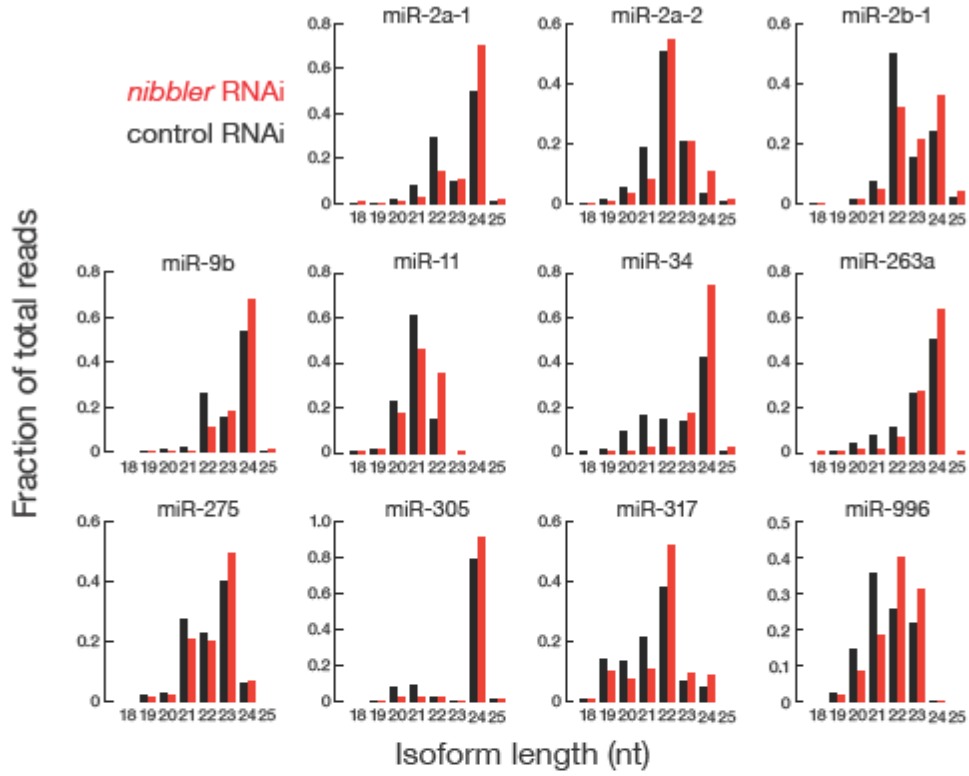

**B**

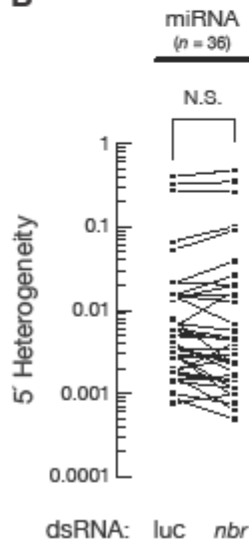

**C**

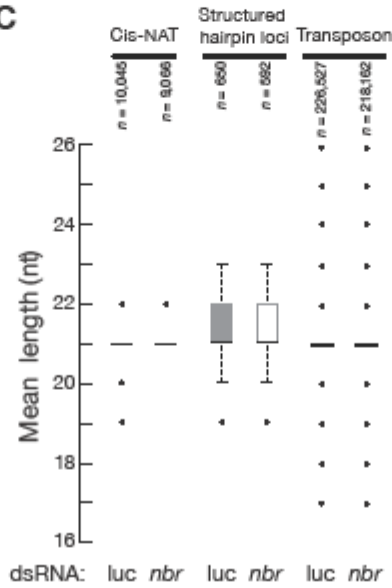

**D**

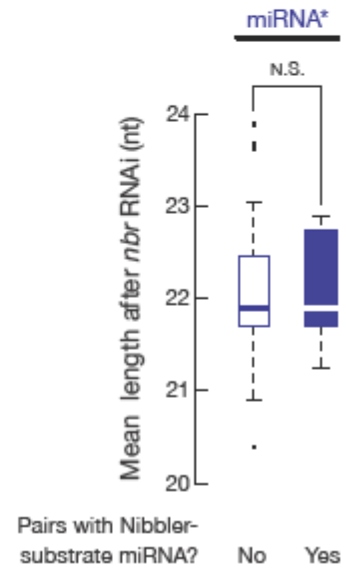

**Figure S4. Characterization of miRNA-Trimming by Nibbler in S2 Cells, Related to Figure 4**

(A) The size distribution of Nibbler substrates in control and *nibbler* dsRNA-treated S2 cell libraries. The size distribution of the 11 miRNAs identified as Nibbler substrates was analyzed by dividing the number of reads for each isoform by the total number reads for that miRNA, using only reads with the canonical seed sequence for each miRNA.

(B) Depletion of Nibbler by RNAi in S2 cells does not influence miRNA 5' heterogeneity. 5' heterogeneity of abundantly expressed S2 cell miRNAs (>200 ppm) treated with control *luciferase* (*luc*) or *nibbler* (*nbr*) dsRNA was analyzed. Wilcoxon signed-rank test was used to calculate *p*-values.

(C) Depletion of Nibbler in S2 cells by RNAi does not alter the length of endo-siRNAs. Box-and-whisker plots display the length of each sequence mapped to the loci previously shown to produce endo-siRNAs (cis-natural antisense transcripts, structured hairpin loci, and transposons). Small RNAs were oxidized before generation of deep sequencing libraries, a procedure previously shown to enrich for Ago2-bound small RNAs [S1]. Unpaired Wilcoxon signed-rank test was used to calculate *p*-values.

(D) Depletion of Nibbler by RNAi in S2 cells does not change the length of the miRNA\* strands that pair with Nibbler substrate miRNAs. The mean length of the 11 miRNA\* strands that pair with the 11 Nibbler substrate miRNAs identified in this study is shown. Mann-Whitney U test was used to determine *p*-values.



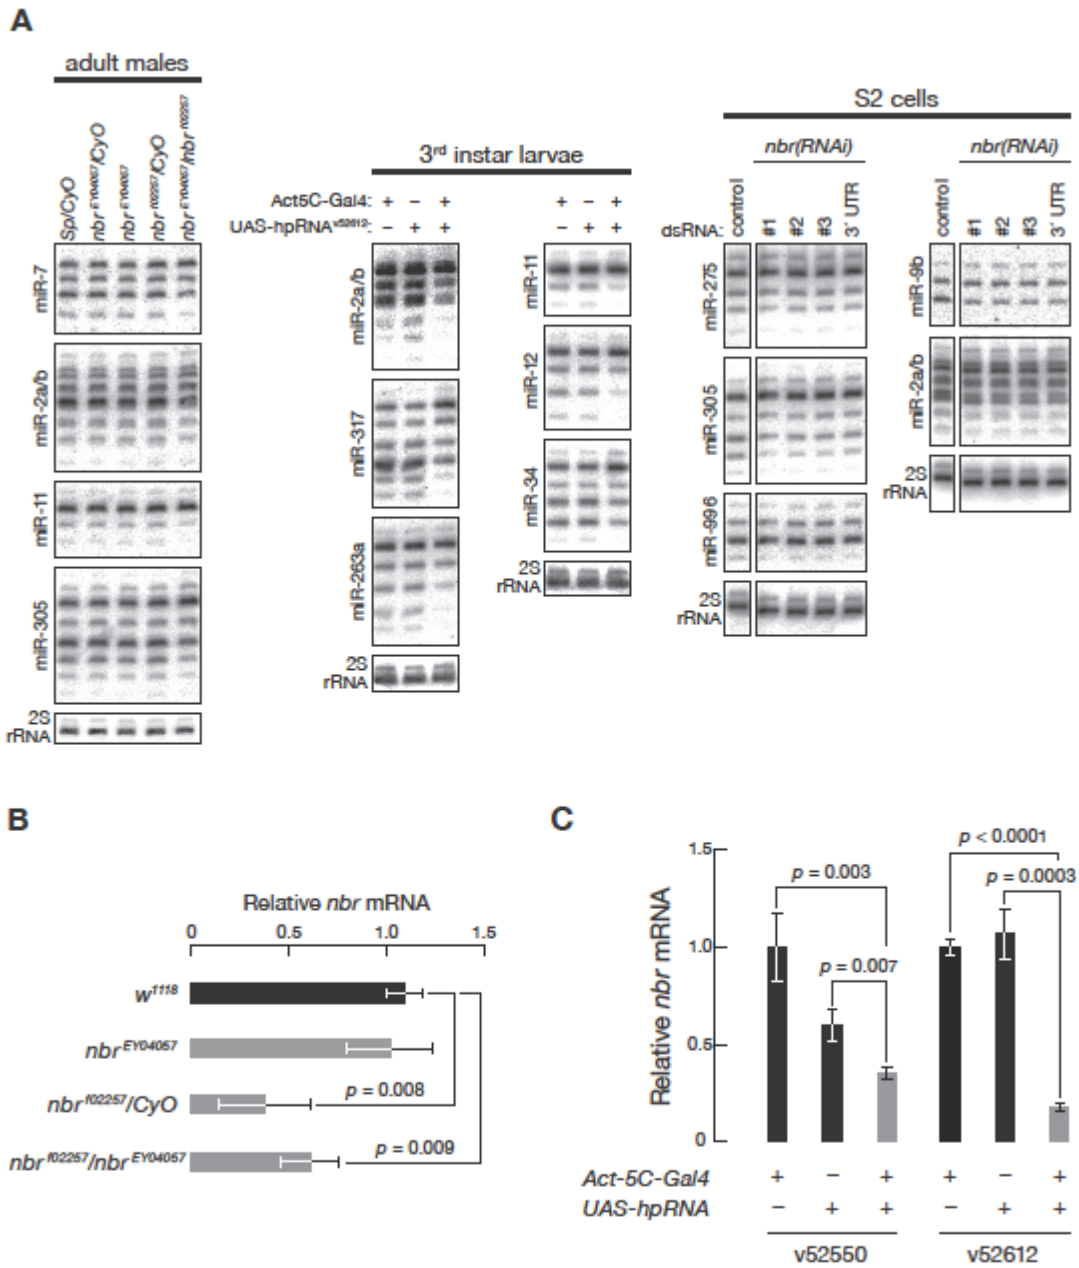



**E**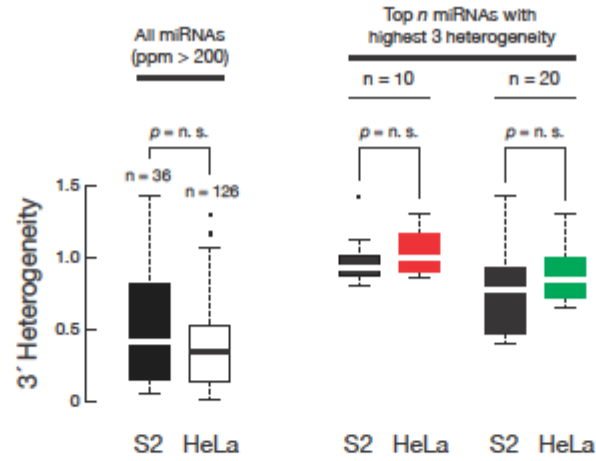**F**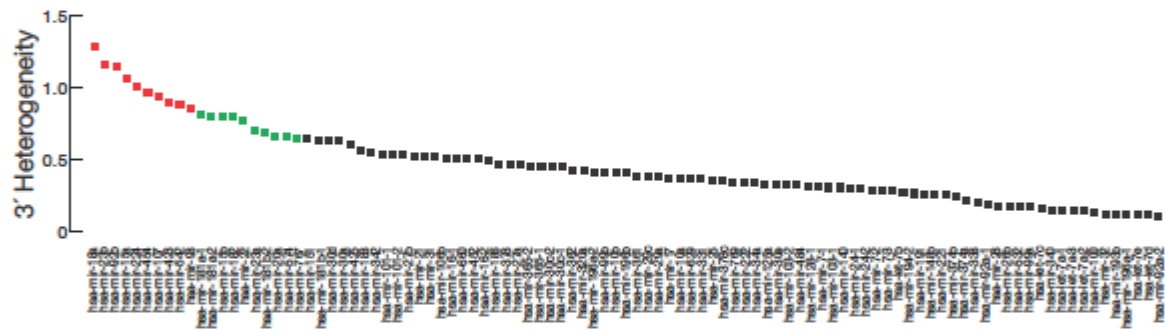**G**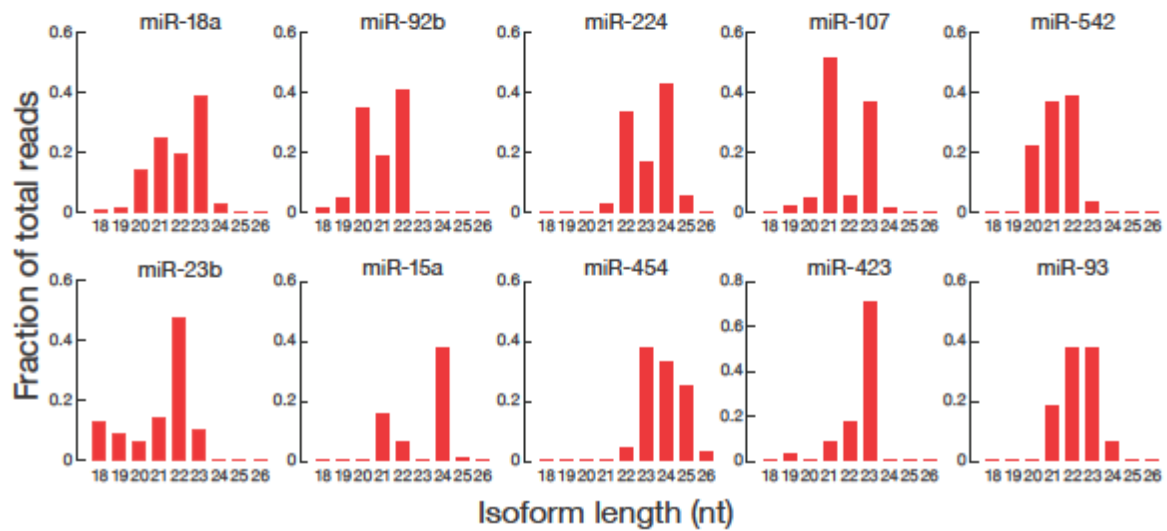

**Figure S5. Nibbler-Mediated miRNA Trimming in Flies and Its Possible Conservation in Mammals, Related to Figure 5**

(A) *nibbler* mRNA abundance in wild-type and mutant flies. *nibbler* mRNA levels in 3–5-day-old whole male flies were measured by quantitative RT-PCR. Data were normalized to mRNA levels of ribosomal protein L32 (alternatively called *rp49* or *RpL32*). Mean  $\pm$  standard deviation for three biological replicates is shown. Student's t-test was used to determine *p*-values.

(B) *nibbler* mRNA abundance in flies depleted of *nibbler* mRNA by RNAi. *nibbler* mRNA levels in 3–5-day-old whole male flies were measured by quantitative RT-PCR. Data were normalized to mRNA levels of ribosomal protein L32. Mean  $\pm$  standard deviation for three biological replicates is shown. Student's t-test was used to determine *p*-values.

(C) Validation of Nibbler substrate miRNAs. Northern hybridization was used to examine Nibbler substrate miRNAs previously identified by high throughput sequencing experiments. Total RNA from 3–5-day-old whole adult males, third instar larvae, or S2 cells was examined. miR-2a and miR-2b cannot be distinguished by Northern hybridization because they differ by a single nucleotide.

(D) Longer isoforms of Nibbler substrate miRNAs accumulate in the absence of Nibbler-mediated trimming. Quantification of the Northern hybridization shown in (B). For each miRNA, the signal intensities of all isoforms were determined and normalized to the signal for 2S rRNA. The signal intensity of each isoform was then normalized to the intensity of the same isoform in the indicated control to determine the relative abundance.

(E–G) Analysis of miRNA 3' heterogeneity and length distribution in small RNA deep sequencing libraries of HeLa cells reveals a possible conservation of miRNA trimming in mammals.

(E) 3' heterogeneity did not significantly differ between miRNAs in S2 cells (small RNA deep sequencing dataset generated in this study) and HeLa cells (NCBI Short Read Archive accession number SRA010045). Left panel compares 3' heterogeneity for all abundantly expressed miRNAs (> 200 ppm). Right panel compares the 10 or 20 miRNAs with the greatest 3' heterogeneity. Mann-Whitney U test was used to determine *p*-values.

(F) 3' heterogeneity of abundantly expressed miRNAs in HeLa cells. The 10 (red) or 20 (green) miRNAs with the greatest 3' heterogeneity are indicated.

(G) Among the 10 HeLa miRNAs with greatest 3' heterogeneity, several (e.g. miR-18a, miR-92b, miR-224, miR-107, miR-15a, and miR-423) exhibit a length distribution with two abundant isoforms separated in length by at least one nucleotides, reminiscent of the profile of most *Drosophila* Nibbler substrate miRNAs (see Figure S4A).

**Table S1A, Related to Figure 4**

Abundance (parts per million; ppm) and mean length of abundant miRNAs (>200 ppm; top) or miRNA\* strands (>10 ppm; bottom) in S2 cells transfected with double-stranded RNA targeting a luciferase mRNA (control RNAi) or *nibbler*. The *p*-value for the change in mean length was determined by a chi-square test.

| miRNA         | Seed Sequence | <i>nibbler</i> RNAi |                  | Control RNAi |                  | Change in length<br>( <i>nbr</i> – control) | <i>p</i> -value           |
|---------------|---------------|---------------------|------------------|--------------|------------------|---------------------------------------------|---------------------------|
|               |               | Reads (ppm)         | Mean Length (nt) | Reads (ppm)  | Mean Length (nt) |                                             |                           |
| <i>bantam</i> | GAGATCA       | 433411              | 22.90            | 459298       | 22.87            | 0.02                                        | 1.55 x 10 <sup>-250</sup> |
| miR-2a-1      | ATCACAG       | 2733                | 23.48            | 3814         | 23.00            | 0.48                                        | 5.24 x 10 <sup>-73</sup>  |
| miR-2a-2      | CACAGCC       | 835                 | 22.30            | 950          | 21.95            | 0.35                                        | 7.41 x 10 <sup>-15</sup>  |
| miR-2b-1/2    | ATCACAG       | 6230                | 22.98            | 11435        | 22.60            | 0.39                                        | 1.83 x 10 <sup>-147</sup> |
| miR-7         | GGAAGAC       | 550                 | 23.73            | 523          | 23.60            | 0.13                                        | 0.08                      |
| miR-8         | AATACTG       | 54164               | 22.71            | 61941        | 22.64            | 0.07                                        | 5.94 x 10 <sup>-111</sup> |
| miR-9b        | CTTTGGT       | 2395                | 23.55            | 1850         | 23.18            | 0.37                                        | 3.87 x 10 <sup>-40</sup>  |
| miR-9c        | CTTTGGT       | 778                 | 21.52            | 862          | 21.46            | 0.06                                        | 0.53                      |
| miR-11        | ATCACAG       | 3132                | 21.13            | 6095         | 20.89            | 0.24                                        | 2.74 x 10 <sup>-106</sup> |
| miR-13b-1/2   | ATCACAG       | 8971                | 22.84            | 14230        | 22.83            | 0.01                                        | 0.0179796                 |
| miR-14        | CAGTCTT       | 14914               | 21.77            | 24596        | 21.78            | -0.02                                       | 2.52 x 10 <sup>-07</sup>  |
| miR-33        | TGCATTG       | 4377                | 20.90            | 6153         | 20.87            | 0.03                                        | 6.13 x 10 <sup>-07</sup>  |
| miR-34        | GGCAGTG       | 9743                | 23.68            | 5641         | 22.58            | 1.09                                        | 0.00                      |
| miR-79        | AAAGCTA       | 1354                | 21.96            | 17611        | 21.96            | 0.00                                        | 0.98                      |
| miR-184       | GGACGGA       | 123174              | 21.67            | 98481        | 21.64            | 0.03                                        | 3.45 x 10 <sup>-28</sup>  |
| miR-252       | TAAGTAC       | 1699                | 22.02            | 5807         | 22.00            | 0.02                                        | 0.53                      |
| miR-263a      | ATGGCAC       | 555                 | 23.50            | 478          | 23.10            | 0.39                                        | 2.15 x 10 <sup>-07</sup>  |
| miR-275       | CAGGTAC       | 2076                | 22.34            | 3102         | 22.14            | 0.21                                        | 2.35 x 10 <sup>-10</sup>  |
| miR-276a      | AGGAACT       | 30366               | 21.92            | 34208        | 21.91            | 0.01                                        | 0.00                      |
| miR-277       | AAATGCA       | 3493                | 22.82            | 3658         | 22.74            | 0.08                                        | 3.69 x 10 <sup>-09</sup>  |
| miR-279       | GACTAGA       | 7057                | 21.06            | 7999         | 21.07            | -0.01                                       | 0.00                      |
| miR-282       | AGCCTCT       | 5421                | 21.95            | 4027         | 21.95            | 0.00                                        | 0.86                      |
| miR-283       | AATATCA       | 1111                | 22.52            | 1173         | 22.45            | 0.07                                        | 0.24                      |
| miR-304       | AATCTCA       | 268                 | 22.32            | 310          | 22.39            | -0.07                                       | 0.90                      |
| miR-305       | TTGTA CT      | 9224                | 23.80            | 9461         | 23.34            | 0.46                                        | 3.31 x 10 <sup>-175</sup> |
| miR-306       | CAGGTAC       | 332                 | 21.15            | 396          | 21.09            | 0.06                                        | 0.98                      |
| miR-308       | ATCACAG       | 805                 | 21.11            | 446          | 21.12            | -0.01                                       | 1.00                      |
| miR-317       | GAACACA       | 2554                | 21.68            | 15748        | 21.22            | 0.46                                        | 1.09 x 10 <sup>-84</sup>  |
| miR-965       | AAGCGTA       | 392                 | 21.90            | 391          | 21.91            | 0.00                                        | 1.00                      |
| miR-970       | CATAAGA       | 1044                | 20.94            | 1769         | 20.94            | 0.00                                        | 1.00                      |
| miR-980       | AGCTGCC       | 1150                | 21.25            | 1284         | 21.18            | 0.07                                        | 0.06                      |
| miR-988       | CCCTTGT       | 971                 | 21.46            | 812          | 21.36            | 0.10                                        | 0.01                      |
| miR-995       | AGCACCA       | 3746                | 20.88            | 2775         | 20.89            | -0.01                                       | 0.61                      |
| miR-996       | GACTAGA       | 1758                | 21.90            | 2574         | 21.49            | 0.41                                        | 8.19 x 10 <sup>-49</sup>  |
| miR-998       | AGCACCA       | 1068                | 20.89            | 1317         | 20.92            | -0.03                                       | 0.73                      |
| miR-1003      | CTCACAT       | 353                 | 21.49            | 411          | 21.46            | 0.03                                        | 1.00                      |

| miRNA*          | Seed     | <i>nibbler</i> RNAi |                  | Control RNAi |                  | Change in length<br>( <i>nbr</i> – control) | <i>p</i> -value           |
|-----------------|----------|---------------------|------------------|--------------|------------------|---------------------------------------------|---------------------------|
|                 | Sequence | Reads (ppm)         | Mean Length (nt) | Reads (ppm)  | Mean Length (nt) |                                             |                           |
| <i>bantam</i> * | CGGTTTT  | 5574                | 22.75            | 16716        | 22.86            | 0.11                                        | 2.19 x 10 <sup>-156</sup> |
| miR-2a-1*       | TCTCAAA  | 17                  | 21.16            | 19           | 21.25            | 0.09                                        | 0.98                      |
| miR-2a-2*       | CCTCATC  | 46                  | 21.67            | 35           | 21.65            | -0.02                                       | 1.00                      |
| miR-2b-2*       | TCTTCAA  | 361                 | 22.21            | 396          | 22.29            | 0.09                                        | 0.94                      |
| miR-7*          | AATAAAT  | 12                  | 21.89            | 12           | 21.89            | 0.00                                        | 1.00                      |
| miR-8*          | ATCTTAC  | 4200                | 21.75            | 4616         | 21.80            | 0.05                                        | 0.00                      |
| miR-9b*         | AGAGCTT  | 216                 | 21.66            | 110          | 21.72            | 0.06                                        | 0.99                      |
| miR-9c*         | AAAGCTT  | 33                  | 21.07            | 44           | 21.17            | 0.10                                        | 0.99                      |
| miR-11*         | AAGAACT  | 34                  | 21.86            | 32           | 21.85            | -0.02                                       | 1.00                      |
| miR-13b-2*      | CGTCAAA  | 166                 | 23.64            | 124          | 23.63            | -0.01                                       | 1.00                      |
| miR-14*         | GGAGCGA  | 310                 | 21.81            | 188          | 21.89            | 0.08                                        | 0.89                      |
| miR-33*         | AATACAA  | 97                  | 21.41            | 82           | 21.30            | -0.11                                       | 0.98                      |
| miR-34*         | AGCCACT  | 659                 | 22.87            | 642          | 22.88            | 0.02                                        | 0.93                      |
| miR-79*         | CTTTGGC  | 31                  | 22.23            | 16           | 22.26            | 0.04                                        | 1.00                      |
| miR-184*        | CTTATCA  | 59                  | 21.70            | 40           | 21.68            | -0.01                                       | 1.00                      |
| miR-275*        | GCGCTAA  | 88                  | 22.60            | 72           | 22.74            | 0.13                                        | 0.99                      |
| miR-277*        | GTGTCAG  | 102                 | 20.39            | 150          | 20.39            | 0.00                                        | 1.00                      |
| miR-281-1*      | AAGAGAG  | 27                  | 21.23            | 15           | 21.20            | -0.03                                       | 0.99                      |
| miR-281-2*      | AGAGAGC  | 278                 | 22.29            | 314          | 22.47            | 0.18                                        | 0.59                      |
| miR-282*        | CATAGCC  | 1296                | 21.94            | 2261         | 21.95            | 0.00                                        | 1.00                      |
| miR-283*        | GGAATTT  | 15                  | 21.89            | 21           | 21.87            | -0.02                                       | 1.00                      |
| miR-304*        | ACTTTGC  | 82                  | 21.97            | 64           | 21.98            | 0.01                                        | 1.00                      |
| miR-305*        | GGCACAT  | 252                 | 21.77            | 333          | 21.84            | 0.07                                        | 0.96                      |
| miR-317*        | GGGATAC  | 133                 | 21.90            | 96           | 21.96            | 0.06                                        | 0.97                      |
| miR-954*        | ATTCACA  | 14                  | 21.67            | 12           | 21.72            | 0.04                                        | 1.00                      |
| miR-965*        | GGGTA AA | 72                  | 22.31            | 61           | 22.32            | 0.01                                        | 1.00                      |
| miR-980*        | GTTTTTC  | 550                 | 23.84            | 550          | 23.88            | 0.04                                        | 0.95                      |
| miR-988*        | TGTGATT  | 39                  | 21.85            | 33           | 21.81            | -0.04                                       | 1.00                      |
| miR-995*        | CCCGAAT  | 23                  | 22.89            | 35           | 22.91            | 0.02                                        | 1.00                      |
| miR-996*        | GCGAACA  | 402                 | 22.71            | 580          | 22.74            | 0.03                                        | 0.90                      |
| miR-998*        | CTGAATT  | 12                  | 21.72            | 21           | 21.52            | -0.20                                       | 1.00                      |
| miR-1012*       | TGGGTAG  | 39                  | 21.31            | 42           | 21.28            | -0.03                                       | 1.00                      |

**Table S1B, Related to Figure 4**

Sequencing statistics: reads (top) and species (bottom). “Small RNA reads (excluding ncRNAs)” correspond to genome-matching reads after excluding annotated non-coding RNAs (ncRNAs), such as rRNA, snRNA, snoRNA, or tRNA. “Transposon-matching reads” correspond to small RNAs mapped to *Drosophila melanogaster* transposons. “cis-NAT-matching reads” correspond to reads matching to mRNAs [S1-S3]. “Structured loci-matching reads” correspond to reads that map to two distinct loci in the *Drosophila melanogaster* genome (CG18854 and a locus overlapping with CG4068), the transcripts of which fold into long hairpin structures and produce the majority of small RNAs of this class [S2, S4]. Where reads were normalized to genome-matching reads (excluding ncRNAs), they are reported in parts per million (ppm).

| S2 cell condition                     | Total Reads | Reads perfectly matching genome | Reads matching annotated ncRNAs | Small RNA reads (excluding ncRNAs) | Pre-miRNA-matching reads (ppm) | Reads excluding ncRNA and pre-miRNA-matching (ppm) | Transposon-matching reads (ppm) | cis-NAT-matching reads (ppm) | Structured loci-matching reads (ppm) |
|---------------------------------------|-------------|---------------------------------|---------------------------------|------------------------------------|--------------------------------|----------------------------------------------------|---------------------------------|------------------------------|--------------------------------------|
| control ( <i>luc</i> ) RNAi           | 10,392,044  | 7,598,980                       | 701,543                         | 6,897,430                          | 838,169                        | 69,105                                             | 33,082                          | 266                          | 2,150                                |
| <i>nibbler</i> RNAi                   | 11,660,479  | 8,516,830                       | 931,335                         | 7,585,490                          | 838,718                        | 74,923                                             | 35,976                          | 271                          | 2,436                                |
| control ( <i>luc</i> ) RNAi, oxidized | 12,652,801  | 4,336,100                       | 118,984                         | 4,217,110                          | 56,410                         | 675,858                                            | 554,656                         | 4,022                        | 16,442                               |
| <i>nibbler</i> RNAi, oxidized         | 10,945,880  | 3,982,380                       | 110,034                         | 3,872,350                          | 66,213                         | 759,628                                            | 620,552                         | 4,391                        | 20,977                               |

| S2 cell condition                     | Total number of species | Number of species perfectly matching genome | Number of species matching annotated ncRNAs | Number of small RNA species (excluding ncRNAs) | Number of pre-miRNA-matching species | Number of species excluding ncRNA and pre-miRNA-matching | Number of transposon-matching species | Number of cis-NAT-matching species | Number of structured loci-matching species |
|---------------------------------------|-------------------------|---------------------------------------------|---------------------------------------------|------------------------------------------------|--------------------------------------|----------------------------------------------------------|---------------------------------------|------------------------------------|--------------------------------------------|
| control ( <i>luc</i> ) RNAi           | 443,253                 | 254,492                                     | 38,170                                      | 216,322                                        | 1,590                                | 214,732                                                  | 83,238                                | 1,639                              | 369                                        |
| <i>nibbler</i> RNAi                   | 560,481                 | 313,547                                     | 45,107                                      | 268,440                                        | 1,702                                | 266,738                                                  | 94,072                                | 1,862                              | 432                                        |
| control ( <i>luc</i> ) RNAi, oxidized | 1,307,000               | 609,746                                     | 14,376                                      | 595,370                                        | 770                                  | 594,600                                                  | 226,527                               | 10,045                             | 650                                        |
| <i>nibbler</i> RNAi, oxidized         | 1,161,140               | 566,296                                     | 13,843                                      | 552,453                                        | 770                                  | 551,683                                                  | 218,162                               | 9,066                              | 592                                        |



## Supplemental Experimental Procedures

### General Methods

Preparation of embryo and S2 cell lysate [S5, S6], recombinant Dicer-1 and Loquacious-PB [S7], clonal S2 cell lines [S8], and small RNA libraries for high throughput sequencing [S1] have been described previously. Northern hybridization was as described [S8], except that *N*-(3-Dimethylaminopropyl)-*N'*-ethylcarbodiimide hydrochloride (Sigma-Aldrich, St. Louis, MO, USA) was used to crosslink 5' phosphorylated small RNAs to Hybond-NX (Amersham, GE Healthcare, Piscataway, NJ) [S9]. Published small RNA libraries used in this study were total S2 cell RNA (Figures 1D, 2C, and S1C) and *ago1* RNAi (Figure 2C) [S10], total fly head RNA (Figures 1D and S1A) [S1], and anti-Ago1 immunoprecipitated small RNAs (Figure S1B) [S11]. Sequence data generated in this study are available from the NIH Gene Expression Omnibus ([www.ncbi.nlm.nih.gov/geo](http://www.ncbi.nlm.nih.gov/geo)) using accession number GSE31689. Fly strain  $y^1 w^{67c23}; P\{w^{+mC}, y^{+mDint2}, EPgy2\}CG9247[EY04057]$  was from the *Drosophila* Stock Center (Bloomington, IN, USA); PBac{WH}CG9247[f02257] was from the Exelixis Collection at Harvard Medical School (Boston, MA, USA); and flies expressing hpRNAs were from the *Drosophila* RNAi Center (Vienna, Austria).

### Quantitative RT-PCR

Total RNA purified from S2 cells or flies was treated with Turbo DNase (Ambion), extracted with phenol:chloroform (1:1), and precipitated with 3 volumes ethanol and 1/10<sup>th</sup> volume sodium acetate (Ambion). Purified RNA was reverse transcribed with SuperScript III (Invitrogen, Carlsbad, CA, USA), and quantitative PCR was performed using SsoFast EvaGreen Supermix (Bio-Rad, Hercules, CA, USA).

### Oligonucleotides

The following table lists oligonucleotide sequences used in this manuscript. Synthetic DNA (Coralville, IA, USA), RNA and modified RNA oligonucleotides (Dharmacon, Lafayette, CO, USA) were deprotected according to the manufacturer's instructions and PAGE purified. Upper case, unmodified nucleotides; lower case, 2'-O-methyl ribose; underlined, locked-nucleic acid (LNA) ribose.

*To clone pENTR/D-Nibbler*

| Name                    | Type | Sequence                        |
|-------------------------|------|---------------------------------|
| MCS- <i>nibbler</i> fwd | DNA  | CAC CAT GGC ACG CAA GAG CCA CAT |
| MCS- <i>nibbler</i> rev | DNA  | TCA CTT AAC ATG GGC ACC C       |

*To generate long double-stranded RNA*

| Name                  | Type | Sequence                                            |
|-----------------------|------|-----------------------------------------------------|
| <i>luciferase</i> fwd | DNA  | TAA TAC GAC TCA CTA TAG GGA TAT CGC CCT GAT CAA G   |
| <i>luciferase</i> rev | DNA  | TAA TAC GAC TCA CTA TAG CCC TCG ACA ATA GCG TTG G   |
| <i>GFP</i> fwd        | DNA  | TAA TAC GAC TCA CTA TAG GGC CAC AAG TTC AGC GTG TCC |

|                        |     |                                                                |
|------------------------|-----|----------------------------------------------------------------|
| <i>GFP rev</i>         | DNA | TAA TAC GAC TCA CTA TAG GGT AGT GGT TGT CGG GCA GCA G          |
| <i>Ago1 fwd</i>        | DNA | TAA TAC GAC TCA CTA TAG GGC TCG CCC AAC CAG GG                 |
| <i>Ago1 rev</i>        | DNA | TAA TAC GAC TCA CTA TAG GGA GAG AGC GTC TGT GGC GAT            |
| <i>Ago2 fwd</i>        | DNA | TAA TAC GAC TCA CTA TAG GGT CAG GCC CTA AAC CGC AAG GA         |
| <i>Ago2 rev</i>        | DNA | TAA TAC GAC TCA CTA TAG GGA TCG CAA TAC AAG ACC GCA CA         |
| <i>CG10210 fwd</i>     | DNA | TAA TAC GAC TCA CTA TAG GGG GCT TTC ACT CTG TCC CGC AAT C      |
| <i>CG10210 rev</i>     | DNA | TAA TAC GAC TCA CTA TAG GGG GTT TCA GGT TAC GCA TCT CCA GTC C  |
| <i>CG12877 fwd</i>     | DNA | TAA TAC GAC TCA CTA TAG GGC TCC CTT CCA CTG CCC CAG A          |
| <i>CG12877 rev</i>     | DNA | TAA TAC GAC TCA CTA TAG GGT CCC TTT CCC GCT CCT TGC T          |
| <i>CG42666 fwd</i>     | DNA | TAA TAC GAC TCA CTA TAG GGC AGA AAG CCA AGC AGG GGA ATG        |
| <i>CG42666 rev</i>     | DNA | TAA TAC GAC TCA CTA TAG GGG CGG AGA GGA GGA ACC AGG AA         |
| <i>CG8368 fwd</i>      | DNA | TAA TAC GAC TCA CTA TAG GGG CCA TTC TGG TGG GGC AAT CT         |
| <i>CG8368 rev</i>      | DNA | TAA TAC GAC TCA CTA TAG GGC GTG CGC TTA TCC CGC TTT G          |
| <i>CG6744 fwd</i>      | DNA | TAA TAC GAC TCA CTA TAG GGT GCG CTT CCT CTG CGT AAT GG         |
| <i>CG6744 rev</i>      | DNA | TAA TAC GAC TCA CTA TAG GGC TGC CGG ACG GGT TGA GTG T          |
| <i>CG6833 fwd</i>      | DNA | TAA TAC GAC TCA CTA TAG GGA AGA CGG TCA CAC TGG TCG            |
| <i>CG6833 rev</i>      | DNA | TAA TAC GAC TCA CTA TAG GGT GTG TTC ACC TGT TGC ACC T          |
| <i>CG7670 fwd</i>      | DNA | TAA TAC GAC TCA CTA TAG GGA CGC CAA AGC AAA CGA AAG GAA G      |
| <i>CG7670 rev</i>      | DNA | TAA TAC GAC TCA CTA TAG GGC GCA TAT CTG GAT GAC GGC AGA        |
| <i>nibbler-1 fwd</i>   | DNA | TAA TAC GAC TCA CTA TAG GGA TGG ACC TGC CCG ACG AGT G          |
| <i>nibbler-1 rev</i>   | DNA | TAA TAC GAC TCA CTA TAG GGT TTA ACT CCA ACC AGA GAT TGC GAA GG |
| <i>nibbler-2 fwd</i>   | DNA | TAA TAC GAC TCA CTA TAG GGA GTA TGG TTT TGA CGA CGC C          |
| <i>nibbler-2 rev</i>   | DNA | TAA TAC GAC TCA CTA TAG GGC GAT CTC CAA CGG ACA ATC T          |
| <i>nibbler-3 fwd</i>   | DNA | TAA TAC GAC TCA CTA TAG GGA TCC GTA AGG TGG GGT TCT C          |
| <i>nibbler-3 rev</i>   | DNA | TAA TAC GAC TCA CTA TAG GGG GTC TAT TGG CCC AGT TTG A          |
| <i>nibbler-UTR fwd</i> | DNA | TAA TAC GAC TCA CTA TAG GGT TGA GGA GCT GGC CTC TG             |
| <i>nibbler-UTR rev</i> | DNA | TAA TAC GAC TCA CTA TAG GGT TCA ATC CTA TTC ATT GCT TTT        |
| <i>CG3931 fwd</i>      | DNA | TAA TAC GAC TCA CTA TAG GGG GCG AGG GCG AGC ACA AGA T          |
| <i>CG3931 rev</i>      | DNA | TAA TAC GAC TCA CTA TAG GGC ACG GCA GGT GGG GAA TGA AG         |

|                    |     |                                                        |
|--------------------|-----|--------------------------------------------------------|
| <i>CG42257 fwd</i> | DNA | TAA TAC GAC TCA CTA TAG GGT GAC GGG CAT CCA GCA GAA GA |
| <i>CG42257 rev</i> | DNA | TAA TAC GAC TCA CTA TAG GGG CGA CAG GGC ATC CGT GAA G  |
| <i>CG8232 fwd</i>  | DNA | TAA TAC GAC TCA CTA TAG GGG GTG AGC ATG CTG CAG CTA    |
| <i>CG8232 rev</i>  | DNA | TAA TAC GAC TCA CTA TAG GGG GCG CAG CAT GCG CAG A      |
| <i>CG3291 fwd</i>  | DNA | TAA TAC GAC TCA CTA TAG GGG GCG AGG GCG AGC ACA AGA T  |
| <i>CG3291 rev</i>  | DNA | TAA TAC GAC TCA CTA TAG GGC ACG GCA GGT GGG GAA TGA AG |
| <i>CG10214 fwd</i> | DNA | TAA TAC GAC TCA CTA TAG GGT CGG AGC CAC ATC GCA TTC A  |
| <i>CG10214 rev</i> | DNA | TAA TAC GAC TCA CTA TAG GGA GTT CCC ACC AAG CGG ACA GG |

*Northern probes*

| Name           | Type | Sequence                                |
|----------------|------|-----------------------------------------|
| miR-11 probe   | DNA  | GCA AGA ACT CAG ACT GTG ATG             |
| miR-12 probe   | DNA  | ACC AGT ACC TGA TGT AAT ACT CA          |
| bantam probe   | DNA  | AAT CAG CTT TCA AAA TGA TCT CA          |
| miR-34 probe   | DNA  | AAC CAG CTA ACC ACA CTG CCA             |
| miR-7 probe    | DNA  | ACA ACA AAA TCA CTA GTC TTC CA          |
| miR-9b probe   | DNA  | TAC AGC TAA AAT CAC CAA AGA             |
| miR-996 probe  | DNA  | GAC GAG CAT GAA ATC TAG TCA             |
| 2S rRNA probe  | DNA  | TAC AAC CCT CAA CCA TAT GTA GTC CAA GCA |
| miR-2a probe   | DNA  | TCA TCA AAG CTG GCT GTG ATA             |
| miR-275 probe  | DNA  | CGC GCG CTA CTT CAG GTA CCT GA          |
| miR-2b-2 probe | DNA  | TCC TCA AAG CTG GCT GTG ATA             |
| miR-317 probe  | DNA  | GGA TAC CAC CAG CTG TGT TCA             |
| miR-305 probe  | DNA  | GAG CAC CTG ATG AAG TAC AAT             |

*For quantitative PCR*

|                    |     |                                     |
|--------------------|-----|-------------------------------------|
| <i>rp49 fwd</i>    | DNA | TGT CCT TCC AGC TTC AAG ATG ACC ATC |
| <i>rp49 rev</i>    | DNA | CTT GGG CTT GCG CCA TTT GTG         |
| <i>nibbler fwd</i> | DNA | TCT TCG CCA ACT GCC CAG ACA G       |
| <i>nibbler rev</i> | DNA | GCC AGC AAG CCG GAG GTC TTG         |

For T7 RNA polymerase transcription of pre-miR-34

| Name           | Type | Sequence                                                                                                                                  |
|----------------|------|-------------------------------------------------------------------------------------------------------------------------------------------|
| <i>Forward</i> | DNA  | GCG AAT TTA ATA CGA C TCA CTA TAT GGC AGT GTG GTT AGC<br>TGG TTG TGT AGC CAA TTA TTG CCG TTG ACA ATT CAC AGC<br>CAC TAT CTT CAC TGC CGC C |
| <i>Reverse</i> | DNA  | ggC GGC AGT GAA GAT AGT GGC TGT GAA TTG TCA ACG GCA<br>ATA ATT GGC TAC ACA ACC AGC TAA CCA CAC TGC CAT ATA<br>GTG AGT CGT ATT AAA TTC GC  |

For Nibbler activity assays

| Name                | Type | Sequence                                        |
|---------------------|------|-------------------------------------------------|
| miR-34-5p (miR-34)  | RNA  | UGG CAG UGU GGU UAG CUG GUU GUG                 |
| miR-34-3p (miR-34*) | RNA  | CAG CCA CUA UCU UCA CUG CCG CC                  |
| miR-34* MM          | RNA  | CAG CCA CUA UCU UCA CUU CCG CC                  |
| miR-34* LNA         | RNA  | CAG CCA CUA UCU U <u>C</u> A <u>C</u> UG CCG CC |
| miR-305-22mer       | RNA  | AUU GUA CUU CAU CAG GUG CUC U                   |
| miR-305*-22mer      | RNA  | GGC ACA UGU UGA AGU ACA CUC A                   |
| miR-305-24mer       | RNA  | AUU GUA CUU CAU CAG GUG CUC UGG                 |
| miR-305*-23mer      | RNA  | CGG CAC AUG UUG AAG UAC ACU CA                  |
| <i>let-7</i>        | RNA  | UGA GGU AGU AGG UUG UAU AGU                     |
| <i>let-7*</i>       | RNA  | CUA UAC AAU GUG CUA GCU UUC U                   |

For miRNA reporter assay

| Name                  | Type        | Sequence                                                                                                        |
|-----------------------|-------------|-----------------------------------------------------------------------------------------------------------------|
| miR-34 target site S  | DNA         | TCG AGG TGT TGA TGC TAA GGT CAC TGC CAG TGT TGA TGC<br>TAA GGT CAC TGC CAG TGT TGA TGC TAA GGT CAC TGC CAG<br>C |
| miR-34 target site AS | DNA         | GGC CGC TGG CAG TGA CCT TAG CAT CAA CAC TGG CAG TGA<br>CCT TAG CAT CAA CAC TGG CAG TGA CCT TAG CAT CAA CAC<br>C |
| miR-34 ASO            | 2'-O-methyl | cac aac cag cta acc aca ctg cca                                                                                 |
| <i>let-7</i> ASO      | 2'-O-methyl | cta cta tac aac cta cta cct ca                                                                                  |

## Supplemental References

- S1. Ghildiyal M., Seitz H., Horwich M.D., Li C., Du T., Lee S., Xu J., Kittler E.L., Zapp M.L., Weng Z. et al. (2008). Endogenous siRNAs Derived from Transposons and mRNAs in *Drosophila* Somatic Cells. *Science*. 320, 1077-1081.
- S2. Czech B., Malone C.D., Zhou R., Stark A., Schlingeheyde C., Dus M., Perrimon N., Kellis M., Wohlschlegel J.A., Sachidanandam R. et al. (2008). An endogenous small interfering RNA pathway in *Drosophila*. *Nature*. 453, 798-802.
- S3. Okamura K., Balla S., Martin R., Liu N., and Lai E.C. (2008). Two distinct mechanisms generate endogenous siRNAs from bidirectional transcription in *Drosophila melanogaster*. *Nat Struct Mol Biol*. 15, 581-590.
- S4. Okamura K., Chung W.J., Ruby J.G., Guo H., Bartel D.P., and Lai E.C. (2008). The *Drosophila* hairpin RNA pathway generates endogenous short interfering RNAs. *Nature*. 453, 803-806.
- S5. Haley B., Tang G., and Zamore P.D. (2003). In vitro analysis of RNA interference in *Drosophila melanogaster*. *Methods*. 30, 330-336.
- S6. Förstemann K., Tomari Y., Du T., Vagin V.V., Denli A.M., Bratu D.P., Klattenhoff C., Theurkauf W.E., and Zamore P.D. (2005). Normal microRNA maturation and germ-line stem cell maintenance requires Loquacious, a double-stranded RNA-binding domain protein. *PLoS Biol*. 3, e236.
- S7. Cenik E.S., Fukunaga R., Lu G., Dutcher R., Wang Y., Hall T.M., and Zamore P.D. (2011). Phosphate and R2D2 Restrict the Substrate Specificity of Dicer-2, an ATP-Driven Ribonuclease. *Mol Cell*.
- S8. Ameres S.L., Horwich M.D., Hung J.H., Xu J., Ghildiyal M., Weng Z., and Zamore P.D. (2010). Target RNA-directed trimming and tailing of small silencing RNAs. *Science*. 328, 1534-1539.
- S9. Pall G.S., and Hamilton A.J. (2008). Improved northern blot method for enhanced detection of small RNA. *Nat Protoc*. 3, 1077-1084.
- S10. Czech B., Zhou R., Erlich Y., Brennecke J., Binari R., Villalta C., Gordon A., Perrimon N., and Hannon G.J. (2009). Hierarchical rules for Argonaute loading in *Drosophila*. *Mol Cell*. 36, 445-456.
- S11. Ghildiyal M., Xu J., Seitz H., Weng Z., and Zamore P.D. (2010). Sorting of *Drosophila* small silencing RNAs partitions microRNA\* strands into the RNA interference pathway. *RNA*. 16, 43-56.
